# Supplementary material for: In Silico and In Vitro Studies of Antibacterial Activity of Cow Urine Distillate (CUD)
Source: Hindawi journal article supplement (doi:10.1155/2024/1904763), 2024-01-08
Supplement: f1 [file 1904763.f1.zip]

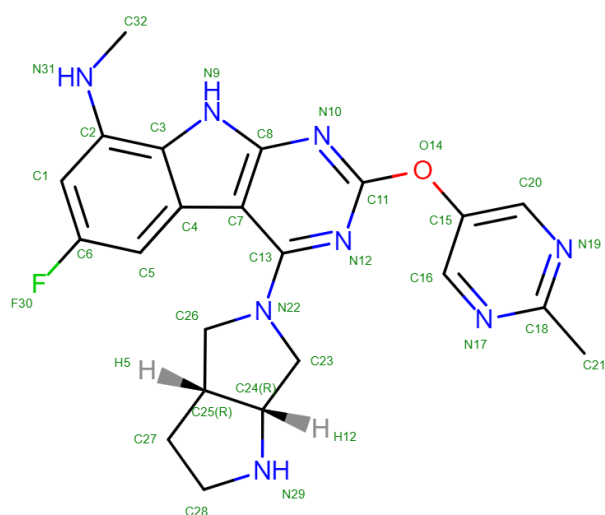

Figure 2S: Native ligand (DOO) of DNA gyrase. IUPAC name: 6-fluoro-4-[(3aR,6aR)-hexahydropyrrolo[3,4-b]pyrrol-5(1H)-yl]-N-methyl-2-[(2-methylpyrimidin-5-yl) oxy]-9H-pyrimido[4,5-b] indol-8-amine
