# Supplementary material for: In Silico and In Vitro Studies of Antibacterial Activity of Cow Urine Distillate (CUD)
Source: Evid Based Complement Alternat Med. 2024 Jan 8;2024:1904763. doi: 10.1155/2024/1904763 (PMC10789515; doi:10.1155/2024/1904763)
Supplement: Supplementary Materials — Figure 1S: Ramachandran plot of DNA gyrase (PDBID: 4KFG). Figure 2S: Native ligand (DOO) of DNA gyrase. IUPAC name: 6-fluoro-4-[(3aR, 6aR)-hexahydropyrrolo[3,4-b] pyrrol-5(1H)-yl]-N-methyl-2-[(2-methylpyrimidin-5-yl) oxy]-9H-pyrimido[4,5-b] indol-8-amine. [file 1904763.f1.zip]

Archive with 3 entries (3 files):
- Figure 1S (1).pdf
- Figure 2S (1).pdf
- Supplemetary material.docx
