# Supplementary figures and images for: In Silico and In Vitro Studies of Antibacterial Activity of Cow Urine Distillate (CUD)
Source: Hindawi journal article supplement (doi:10.1155/2024/1904763), 2024-01-08

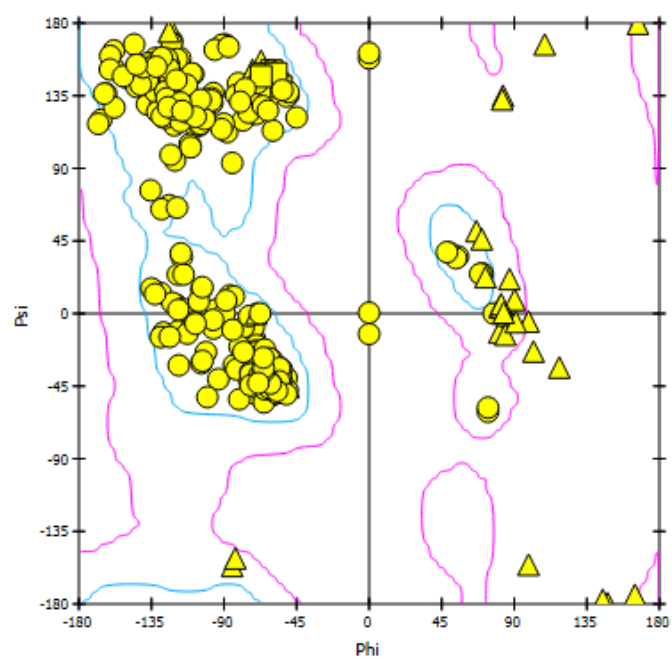

Figure 1S: Ramachandran plot of DNA gyrase (PDBID: 4KFG)

Supplement: f1 [file 1904763.f1.zip]
